# Supplementary material for: Crystal direction selection by ferroelastic writing
Source: Research Square preprint supplement (doi:10.21203/rs.3.rs-5587758/v1), 2024-12-13
Supplement: Supplementary file 1 [file feefd3ec2dcda815a4c518d4.docx]

Supplementary Information for

**Crystal direction selection by ferroelastic writing**

Wei Peng1,2,3*†, Wenjie Meng4,5†, Younji Kim6†, Jiyong Yoon6, Liang Si7,8, Kesen Zhao4,5,9, Shuai Dong4,5,9, Yubin Hou4,5, Chuanying Xi4,5, Li Pi4,5,9, Aditya Singh1, Ana M. Sanchez1, Richard Beanland1, Tae Won Noh2,3, Qingyou Lu4,5,9*, Daesu Lee6*, Marin Alexe1*

1Department of Physics, University of Warwick; Coventry, United Kingdom.

2Center for Correlated Electron Systems, Institute for Basic Science; Seoul, Korea.

3Department of Physics and Astronomy, Seoul National University; Seoul, Korea.

4Anhui Key Laboratory of Low-Energy Quantum Materials and Devices, High Magnetic Field Laboratory, HFIPS, Chinese Academy of Sciences; Hefei, China.

5Hefei National Research Center for Physics Sciences at the Microscale, University of Science and Technology of China; Hefei, China.

6Department of Physics, Pohang University of Science and Technology; Pohang, Korea.

7Institut für Festkörperphysik, TU Wien; Vienna, Austria.

8School of Physics, Northwest University; Xi’an, China.

9Anhui Laboratory of Advanced Photon Science and Technology, University of Science and Technology of China; Hefei, China.

*Corresponding author: Email: [wpeng013@gmail.com](mailto:wpeng013@gmail.com) (W.P.); [qxl@ustc.edu.cn](mailto:qxl@ustc.edu.cn) (Q.L.); [dlee1@postech.ac.kr](mailto:dlee1@postech.ac.kr) (D.L.); [m.alexe@warwick.ac.uk](mailto:m.alexe@warwick.ac.uk) (M.A.)

†These authors contributed equally to this work

Supplementary Fig. 1. a, ECC image of an as-grown (La0.7Sr0.3)(Mn0.9Ru0.1)O3 film on (LaAlO3)0.3(Sr2TaAlO6)0.7 (001) substrates. The image was processed in false colors following Fig. 1b in the main text. b, ECC image of the (La0.7Sr0.3)(Mn0.9Ru0.1)O3 (001) film after mechanically writing in sliding directions for four different domains. Red and yellow dashed arrows indicate fast and slow scan directions, respectively.

Supplementary Fig. 2. a, In the static case, an AFM tip generates shear stress *σ*13 in all directions in the vicinity of the tip contact area. b, In the dynamic case as the tip slides on the sample surface, effective trailing force arises according to the fast and slow scan directions, resulting in a net trailing stress field. Inset shows the trajectory (black arrows) of the AFM tip, where the fast and slow scan directions are defined. The black solid line indicates the sliding path of the tip with a normal loading force while the black dotted line indicates transfer of the tip when lifted between paths.

Supplementary Fig. 3. ECC images of the SrRuO3 (111) film in Fig. 2 of main text before ferroelastic writing (a) and after writing (b). We note that there are contrast features in the form of curved lines throughout the images, e.g., marked by the grey arrow in (b), which run through the domains and refuse to be switched. We suspect that these are antiphase boundaries, which is a consequence of the lower translation symmetry of SrRuO3 compared to that of the substrate.

Supplementary Fig. 4. MFM images of SrRuO3 (111) film acquired with a magnetic field of 1 T while heating from 20 K. The contrast vanishes near the Curie temperature (~160 K), indicating the magnetic nature of the contrast.

Supplementary Fig. 5. MFM images captured at 5 K with the magnetic field sweeping from 10 to –12 T, which show the robustness and spatial immobility of the magnetic contrast. Ferromagnetic switching was found to happen between –0.6 and –0.7 T.

Supplementary Fig. 6. MFM images captured at 5 K with the field ramping from 5 to 30 T, which shows the vanishment of magnetic contrast above 27 T.

Supplementary Fig. 7. a, Image thresholding analysis of the ECC image of the Hall bar device of SrRuO3 (111) to estimate its ferroelastic domain populations (b–d), which are 8.3%, 44.4%, and 47.3%, respectively. e, Transverse resistivity of the device in (a) with the magnetic field rotating in the plane, displaying three hysteretic jumps due to magnetic switching. The inset schematic illustrates the geometric relation between the inferred MEAs and the crystalline directions in the projected plane. Thus, the MEAs are supposed to along one of the three equivalent <110> directions tilted from the out-of-plane direction. This is also corroborated by the measurement in the plane in Supplementary Fig. 8. Accordingly, the magnetic populations are estimated to be 46.5%, 41.5%, and 12%, based on the change of the Hall resistivity.

Supplementary Fig. 8. Hall effect measurement with the magnetic field rotating in the plane for a different SrRuO3 (111) sample from the one in Supplementary Fig. 7. a, ECC image to show the typical ferroelastic domain structure of SrRuO3. By image thresholding analysis, the domain populations are estimated to be 57.6% (purple), 25.5% (green), and 16.9% (yellow), respectively. b, Transverse resistivity versus the magnetic field angle, showing two hysteretic jumps. As shown by the inset schematic, the magnetic easy axes <110> of two ferroelastic domains form the same angle, ~19°, with the out-of-plane [111] axis in the projected plane, while it is ~35° for the third domain. This agrees with the observed two hysteretic jumps in the angle-dependent transverse resistivity. Accordingly, the magnetic populations are estimated to be 80.5% (for two domain species) and 19.5%, which corresponds well to the ferroelastic domains (purple + green = 83.1%) and (yellow = 16.9%), respectively.

**Supplementary Fig. 9.** **a**, Angle-dependent AHE measurements for the 10 nm-thick SrRuO3 (001) film after ferroelastic writing with varying loading forces of atomic force microscope (AFM) tip. The SrRuO3 (001) film was initially in a uniform *X* domain, and then ferroelastic writing proceeded to switch from the *X* domain to the domain. The SrRuO3 was capped with 4 unit cell-thick SrTiO3 layers. **b**, Controlled depth as a function of AFM tip loading forces.

Supplementary Fig. 10. a, Schematic to show the emergence of magnetic contrast in MFM induced by the in-plane components of magnetization, *M*in, with head-to-head or tail-to-tail patterns. b,c, ECC image (b) and MFM image (c) of SrRuO3 (111) film captured from the same region at 300 and 5 K, respectively. d, Binary image of the corresponding magnetic domain structure converted from the ferroelastic domain structure in (b), based on the inferred magnetic anisotropy. e, Simulated MFM image of the magnetic domains in (d).

Supplementary Fig. 11. Line profiles (b, d) of mechanically written stripe nanodomains (a, c), respectively. The line profiles were acquired along the white dotted arrow. The nanodomains in (a) and (c) were written by a tip with a radius of ~50 nm and ~20 nm, respectively.

**Supplementary Fig. 12. a**,AHE loop measured at 70 K for 10 nm-thick SrRuO3 (001) film with 4 unit cell-thick SrTiO3 capping layer. The anomalous term was extracted by subtracting the linear ordinary term from *ρxy.* **b**,Field-free spin orbit torque (SOT) switching loops, measured at 70 K, for differently designed vertical heterogeneities of ferromagnetic anisotropy. Referring to the full AHE loop in (A), the switching ratios were found to be ~11% (yellow circles) and ~22% (green circles) for the vertical magnetic textures of and , respectively. For a homogeneous magnetic texture, we did not observe any SOT switching (purple circles).Considering the thickness (i.e., 10 nm) of the SrRuO3 layer and its spin diffusion length (approximately, 1.5 nm) (ref. 40), the measured extent of partial SOT switching for each vertical magnetic texture is quantitatively reasonable.
